# Supplementary material for: Exploring Facilitators and Barriers to Adherence to Evidence-Based Practice among Health Professionals at Tirunesh Beijing General Hospital, Addis Ababa, Ethiopia: A Qualitative Study
Source: Research Square preprint supplement (doi:10.21203/rs.3.rs-6925137/v1), 2025-07-01
Supplement: Supplementary file 1 [file d6603f4979b30d08bc7375a5.pdf]

## Annex 1: Information Sheet and Consent Form

### Part I: Information Sheet

**Institution:** Yekatit 12 Medical College, School of Public Health

**Department:** Health Care Quality

**Study Title:** Exploring Facilitators and Barriers to Adherence to Evidence-Based Practice among Health Professionals at Tirunesh Beijing General Hospital, Addis Ababa, Ethiopia, 2024

Hello! How are you? My name is Abigiya Zewde Biru. I'm a third-year student at Yekatit 12 Medical College, School of Public Health, Department of Health Care Quality. I am conducting a study titled "Exploring Facilitators and Barriers to Adherence to Evidence-Based Practice among Health Professionals at Tirunesh Beijing General Hospital, Addis Ababa, Ethiopia, 2024."

The purpose of the study is to explore facilitators and barriers to adherence to evidence-based practice among health professionals at Tirunesh Beijing General Hospital.

Your participation involves no significant risk other than the time required to answer the questions. There is no financial compensation. However, your contribution is valuable in identifying strategies to enhance evidence-based practice and healthcare quality.

Your responses will be kept confidential. Participation is voluntary, and you may withdraw at any time without any consequences. Your name will not be recorded, and the information will only be used for academic purposes.

**Contact Information:**

**Abigiya Zewde Biru**

**Phone:** +251911134253 / +251929373712

**Email:** abigiya1342@gmail.com

☐ Yes, I agree to participate. ☐ No, I do not agree.

### Part II: Consent Form

I understand that my identity and the information I provide will remain confidential. I know that I can refuse to participate or withdraw at any time. I acknowledge that no monetary compensation will be provided. I consent to participate in this study to help improve evidence-based practice.

**Signature of the participant:** \_\_\_\_\_

**Participant Code No:** \_\_\_\_\_

**Date:** \_\_\_\_\_

**Data collector's name:** \_\_\_\_\_

**Signature:** \_\_\_\_\_

**Date:** \_\_\_\_\_

**Key Informant Interview (KII) Guide – Based on Social Cognitive Theory**

| S/N | Question                                                  | Probing                                                                                                                                                                                                                                                                                                                   |
|-----|-----------------------------------------------------------|---------------------------------------------------------------------------------------------------------------------------------------------------------------------------------------------------------------------------------------------------------------------------------------------------------------------------|
| 1.  | <b>Socio demographic characteristic of the respondent</b> |                                                                                                                                                                                                                                                                                                                           |
|     | Age                                                       |                                                                                                                                                                                                                                                                                                                           |
|     | Sex                                                       | <input checked="" type="checkbox"/> Male<br><input checked="" type="checkbox"/> Female                                                                                                                                                                                                                                    |
|     | Role                                                      | <input checked="" type="checkbox"/> Directorate<br><input checked="" type="checkbox"/> Team leader<br><input checked="" type="checkbox"/> Other                                                                                                                                                                           |
|     | Marital status                                            | <input checked="" type="checkbox"/> single<br><input checked="" type="checkbox"/> married<br><input checked="" type="checkbox"/> separated                                                                                                                                                                                |
|     | Profession                                                | <input checked="" type="checkbox"/> Specialist<br><input checked="" type="checkbox"/> Medical Doctor (GP)<br><input checked="" type="checkbox"/> Nurse<br><input checked="" type="checkbox"/> Midwifery<br><input checked="" type="checkbox"/> Pharmacy<br><input checked="" type="checkbox"/> Laboratory 6.Other specify |
|     | Educational level                                         | <input checked="" type="checkbox"/> Degree<br><input checked="" type="checkbox"/> Master and above                                                                                                                                                                                                                        |
|     | Year of experience                                        | ----- years                                                                                                                                                                                                                                                                                                               |
| 2.  | <b>Behavioural</b>                                        |                                                                                                                                                                                                                                                                                                                           |
|     | Exploration of evidence based practice                    | What is your understanding of evidence-based practice?                                                                                                                                                                                                                                                                    |

|    |                                                                                        |                                                                                                                     |
|----|----------------------------------------------------------------------------------------|---------------------------------------------------------------------------------------------------------------------|
|    | Facilitators of Evidence-Based Practice                                                | Can you share any successful strategies or initiatives that promote evidence-based practice?                        |
|    | Personal Experiences and Perspectives                                                  | Can you provide examples of situations where evidence-based practice was particularly challenging or successful?    |
| 3. | <b>Personal factors</b>                                                                |                                                                                                                     |
|    | Exploration of evidence based practice                                                 | How do you perceive the importance of evidence-based practice in healthcare delivery?                               |
|    | Facilitators of Evidence-Based Practice                                                | In your opinion, what factors facilitate adherence to evidence-based practice at Tirunesh Beijing General Hospital? |
|    | Barriers to Evidence-Based Practice                                                    | What challenges do health professionals face in implementing evidence-based practice?                               |
|    | Personal Experiences and Perspectives                                                  | How do you think attitudes towards evidence-based practice influence clinical decision-making?                      |
|    |                                                                                        |                                                                                                                     |
| 4. | <b>Environment</b>                                                                     |                                                                                                                     |
|    | Barriers to Evidence-Based Practice                                                    | Are there any institutional or organizational barriers hindering adherence to evidence-based practice?              |
|    | <b>Recommendations and Conclusion:</b>                                                 |                                                                                                                     |
|    | ✓ What recommendations do you have for improving adherence to evidence-based practice? |                                                                                                                     |
|    | ✓ Any final thoughts or additional comments?                                           |                                                                                                                     |

## Focus Group Discussion (FGD) Guide

### Welcome Message:

Good morning/afternoon/evening. Thank you all for joining today's discussion on evidence-based practice in our healthcare setting. Your experiences and ideas are crucial for identifying challenges and improvements related to EBP.

This is a respectful and confidential environment. All views are welcome. Let's keep our conversation inclusive and productive.

### Ground Rules:

1. Respect each other's opinions.
2. One person speaks at a time.
3. Confidentiality is maintained.
4. Be open and honest.
5. Participate actively.

| S/N | Question                                | Probing                                                                                                                                                                                               |
|-----|-----------------------------------------|-------------------------------------------------------------------------------------------------------------------------------------------------------------------------------------------------------|
| 1.  | Ice breaker                             | ✓ Share a recent experience where evidence-based practice positively impacted your work.                                                                                                              |
|     | Exploration of Evidence-Based Practice: | ✓ Ask participants what evidence-based practice means to you personally,<br>✓ How do you currently incorporate evidence-based practice into your work?                                                |
|     | Facilitators and Barriers:              | ✓ What factors do you believe facilitate adherence to evidence-based practice?<br>✓ Conversely, what barriers or challenges do you face in implementing evidence-based practice?                      |
|     | Reflection on Hospital Environment:     | ✓ How does the hospital environment support or hinder evidence-based practice?<br>✓ Are there any organizational policies or practices that impact your ability to adhere to evidence-based practice? |
|     | Action Planning:                        | ✓ Based on the discussion, what actionable steps can be taken to improve adherence to evidence-based practice?                                                                                        |
|     | <b>Conclusion:</b>                      | ✓ Summarize key points discussed during the focus group.<br>✓ Thank participants for their contributions and reiterate                                                                                |

|  |  |                  |
|--|--|------------------|
|  |  | confidentiality. |
|--|--|------------------|
